# Supplementary material for: Evidence for a stem-cell lineage in corneal squamous cell carcinoma using synchrotron-based Fourier-transform infrared microspectroscopy and multivariate analysis
Source: Royal Society of Chemistry journal article supplement (doi:10.1039/c0an00507j), 2010-01-01
Supplement: c0an00507j.pdf [file c0an00507j.pdf]

# **Evidence for a stem-cell lineage in corneal squamous cell carcinoma using synchrotron-based Fourier-transform infrared microspectroscopy and multivariate analysis**

Jemma G. Kelly<sup>1</sup>, Takahiro Nakamura<sup>2</sup>, Shigeru Kinoshita<sup>2</sup>, Nigel J. Fullwood<sup>3</sup>, Francis L. Martin<sup>1\*</sup>

*<sup>1</sup>Centre for Biophotonics, Lancaster Environment Centre, Bailrigg, Lancaster University, Lancaster LA1 4YQ, UK; <sup>2</sup>Department of Ophthalmology, Kyoto Prefectural University of Medicine, Kawaramachi Hirohoji, Kamigyo-ku, Kyoto 602-0841, Japan; <sup>3</sup>Biomedical and Life Sciences, School of Health and Medicine, Lancaster University, Lancaster, UK*

**Supplementary data:  
Figures = 2**

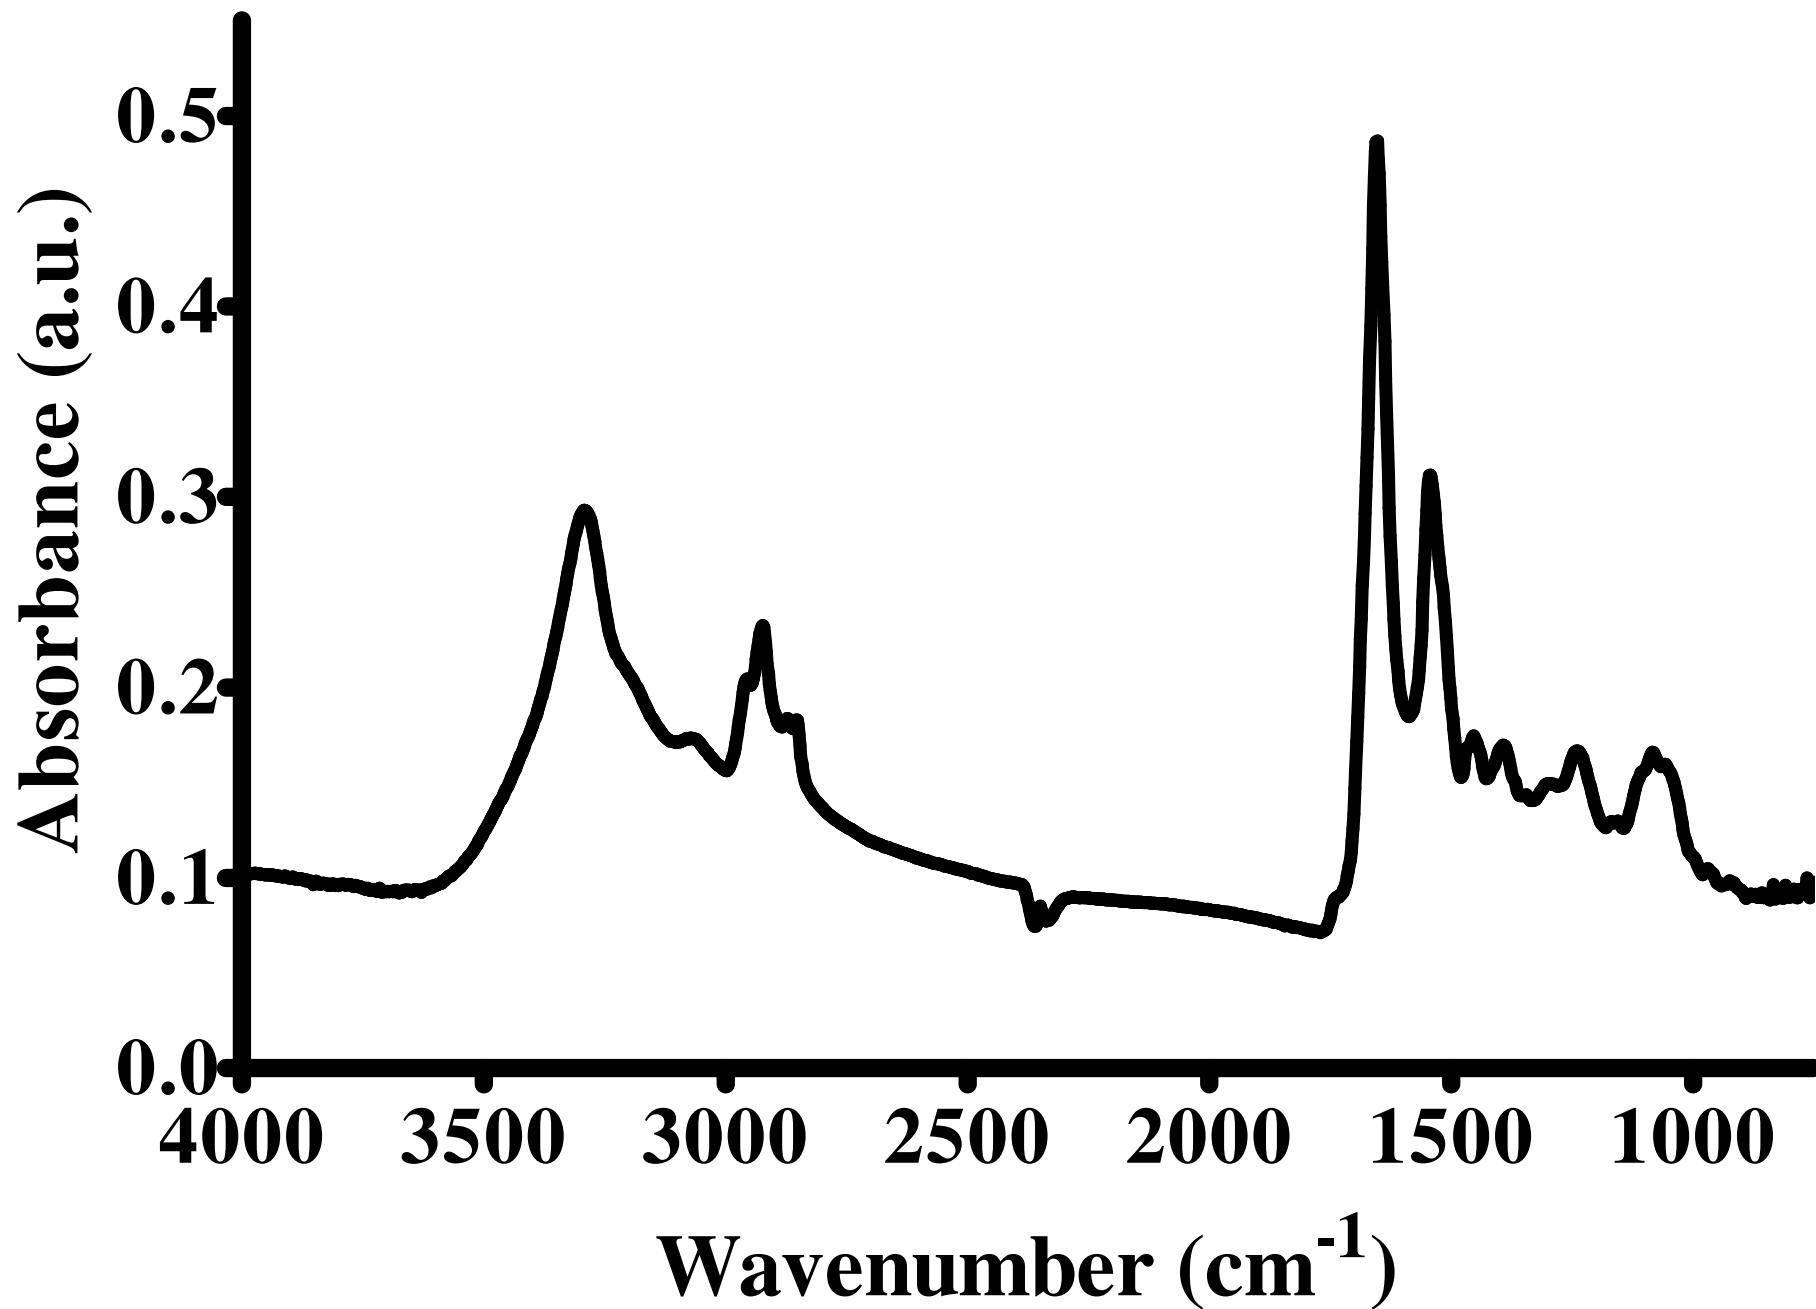

**Fig. S1** Raw spectrum of corneal squamous cell carcinoma: range 4000 cm<sup>-1</sup>-750 cm<sup>-1</sup>.

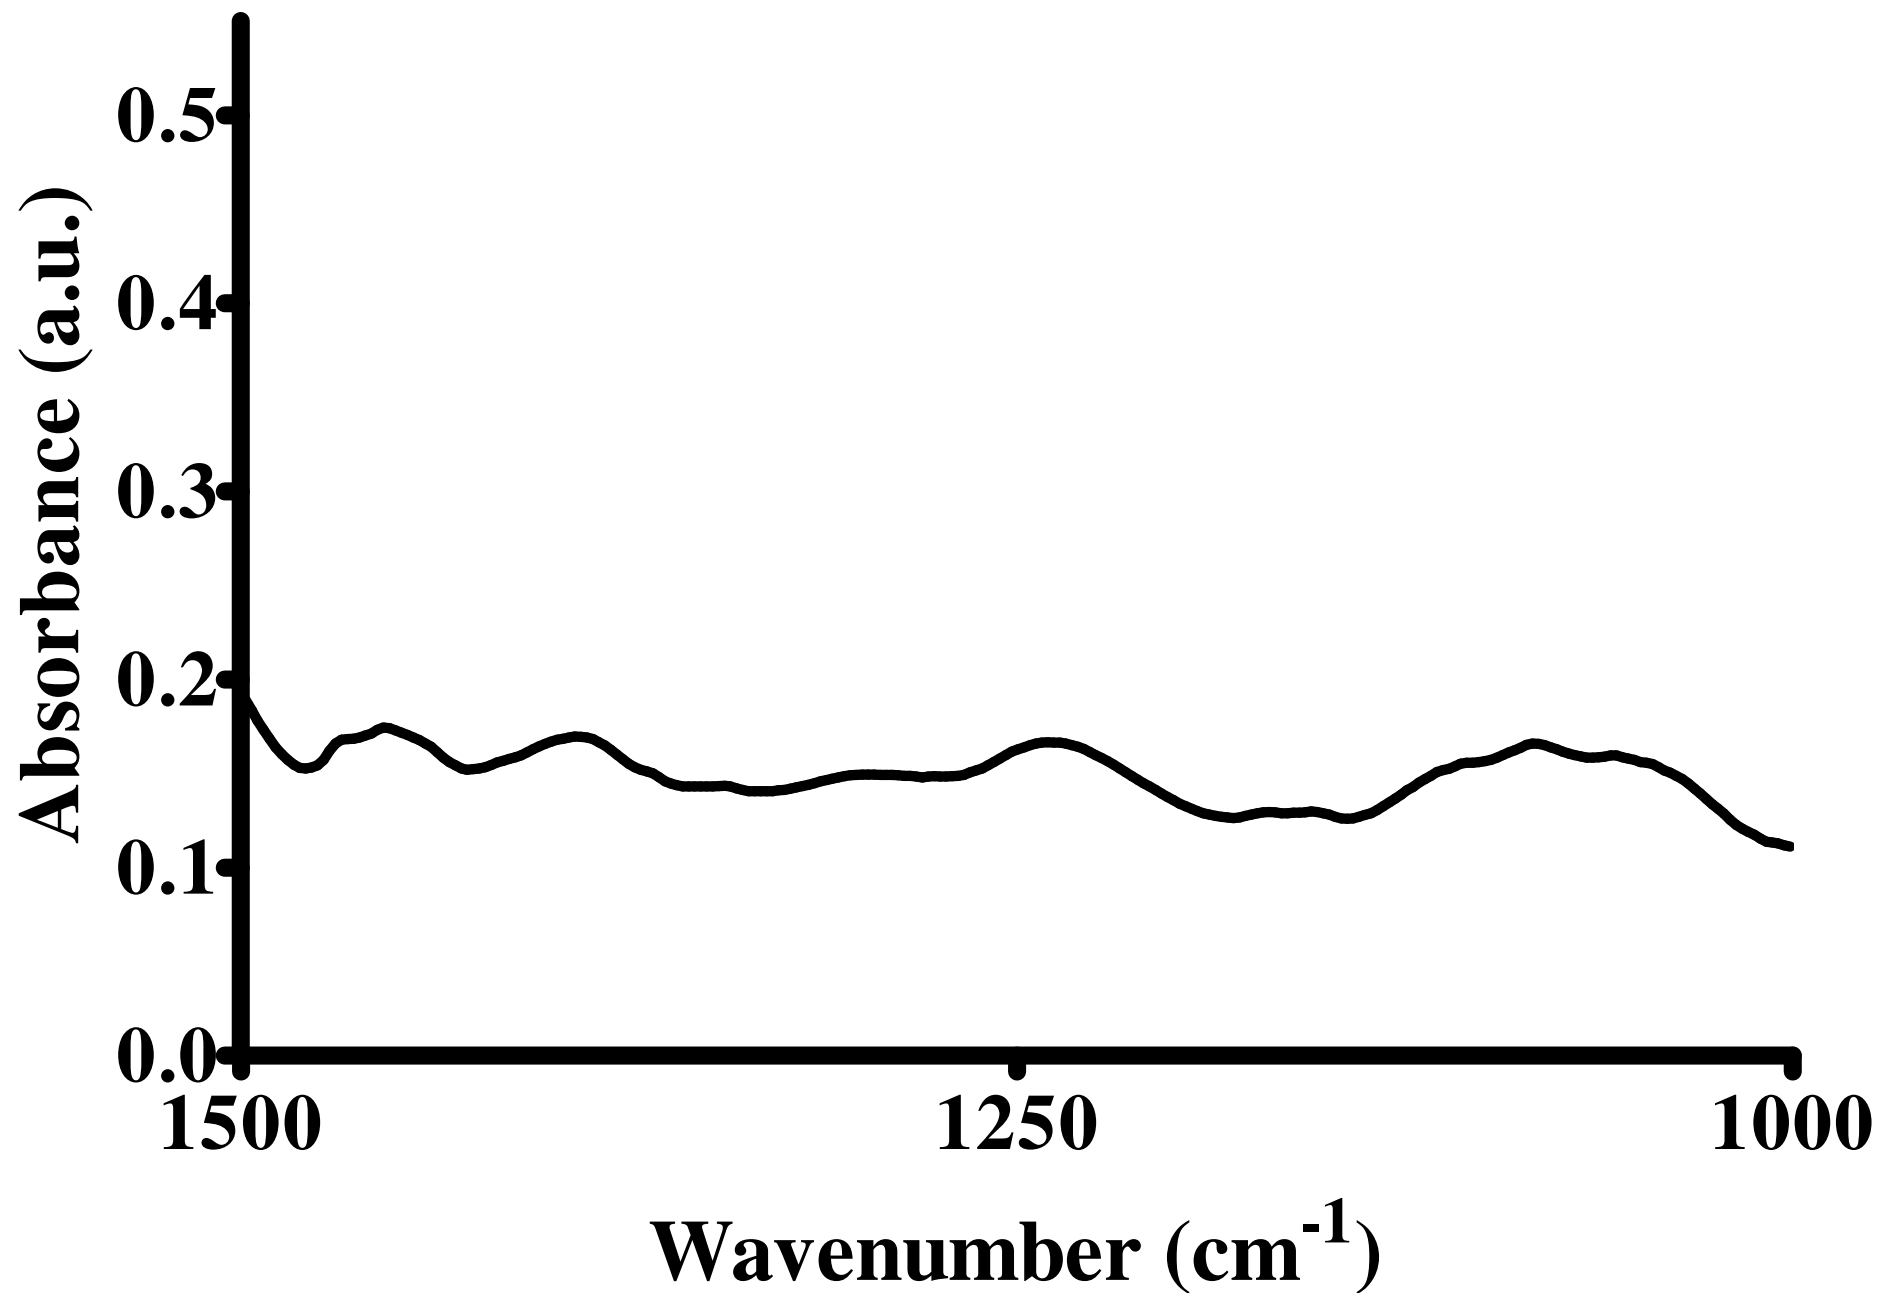

**Fig. S2** Raw spectrum of corneal squamous cell carcinoma: range 1500 cm<sup>-1</sup>-1000 cm<sup>-1</sup>.
